# Supplementary material for: Promotion of higher order of cognition in undergraduate medical students using case-based approach
Source: PubMed Central journal article supplement — J Educ Health Promot. 2017 Aug 9;6:75. doi: 10.4103/jehp.jehp_39_17 (PMC5561721; doi:10.4103/jehp.jehp_39_17), 2017-08-09
Supplement: JEHP-6-75_Ann1.pdf [file JEHP-6-75_Ann1.pdf]

**Annexure 1**

*Feedback form for students (regarding case-based learning)*

Indicate your answers to the questions below by ticking (✓) one response to each of the following:

SA = Strongly agree; A = Agree; N = Neutral; D = Disagree; SD = Strongly disagree

Please note that the survey is anonymous.

| Serial number | Perceptions                                                         | SA | A | N | D | SD |
|---------------|---------------------------------------------------------------------|----|---|---|---|----|
| 1             | Cases/scenarios made the subject more interesting                   |    |   |   |   |    |
| 2             | Helped in better understanding of the disease process               |    |   |   |   |    |
| 3             | Motivated me to use additional learning resources                   |    |   |   |   |    |
| 4             | Made me feel more confident about dealing with a clinical situation |    |   |   |   |    |
| 5             | Improved my learning abilities                                      |    |   |   |   |    |
| 6             | Enhanced my communication skills                                    |    |   |   |   |    |
| 7             | Facilitates team learning                                           |    |   |   |   |    |
| 8             | Cases fitted my level of knowledge                                  |    |   |   |   |    |
| 9             | Cases selected were appropriate                                     |    |   |   |   |    |
| 10            | I was explained what was expected                                   |    |   |   |   |    |
| 11            | The intervention of the teacher was helpful                         |    |   |   |   |    |
| 12            | The session was better than tutorial                                |    |   |   |   |    |
| 13            | More such sessions should be added                                  |    |   |   |   |    |

Case-based learning should be added in..... all topics/some topics/no topics

Case-based learning should be.....used as the primary method/used with lectures/discontinued

Suggestions for improvement.....
