# Supplementary material for: Promotion of higher order of cognition in undergraduate medical students using case-based approach
Source: PubMed Central journal article supplement — J Educ Health Promot. 2017 Aug 9;6:75. doi: 10.4103/jehp.jehp_39_17 (PMC5561721; doi:10.4103/jehp.jehp_39_17), 2017-08-09
Supplement: JEHP-6-75_Ann2.pdf [file JEHP-6-75_Ann2.pdf]

**Annexure 2**

*Feedback form for faculty members (regarding case-based learning)*

Indicate your answers to the questions below by ticking (√) one response to each of the following:

SA = Strongly agree; A = Agree; N = Neutral; D = Disagree; SD = Strongly disagree

Please note that the survey is anonymous.

| Serial number | Perceptions                                              | SA | A | N | D | SD |
|---------------|----------------------------------------------------------|----|---|---|---|----|
| 1             | Cases/scenarios will make the subject more interesting   |    |   |   |   |    |
| 2             | Will help in better understanding of the disease process |    |   |   |   |    |
| 3             | Will help identify gaps in students' learning/knowledge  |    |   |   |   |    |
| 4             | Will improve the students' learning abilities            |    |   |   |   |    |
| 5             | Will lead to improved student-teacher interaction        |    |   |   |   |    |
| 6             | Will increase workload on faculty                        |    |   |   |   |    |
| 7             | More such sessions should be added                       |    |   |   |   |    |

Case-based learning should be added in..... all topics/some topics/no topics

Case-based learning should be.....used as the primary method/used with lectures/discontinued

Problems with case-based approach.....

Suggestions for improvement .....

Other areas where case-based approach may be used.....
